# Supplementary material for: The force-dependent filamin A–G3BP1 interaction regulates phase-separated stress granule formation
Source: Oxford University Press journal article supplement (doi:10.1242/jcs.260684), 2023-02-20
Supplement: jcs260684supp.pdf [file jcs260684supp.pdf]

**Fig. S1. Amino acid alignment of human and mouse G3BP1 and G3BP2.** The alignment was generated by Clustal Omega. FLNA-binding site is indicated in a square. Red underline indicates domain 4 (320-416) and blue underline indicates domain 5 (417-466) in Fig. 4.

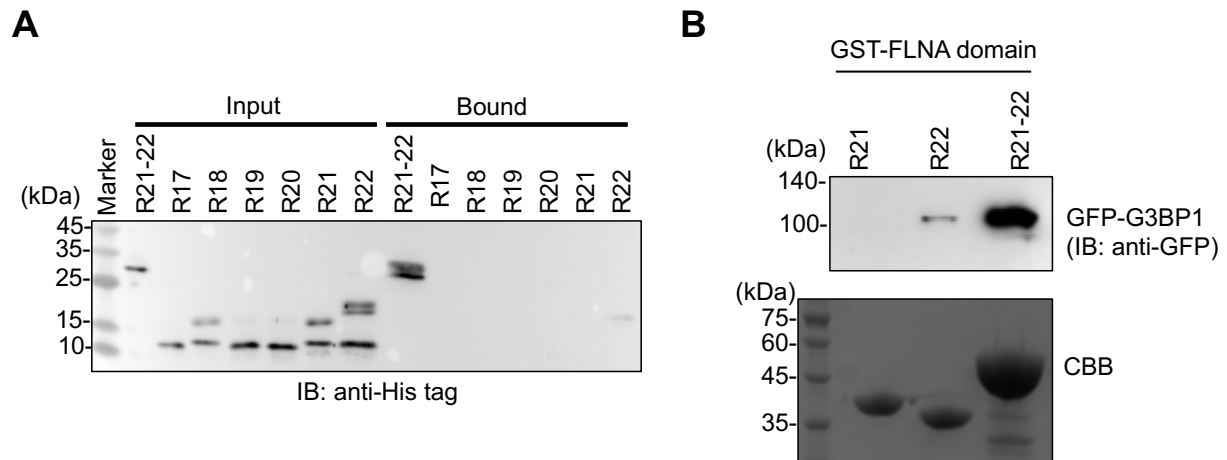

**Fig. S2. FLNA R22 is necessary for FLNA-G3BP1 interaction.**

**(A)** Purified His-tag FLNA repeats were incubated with GST-G3BP1 immobilized on glutathione beads. Bound protein was detected by western blotting against His-tag. Note that no bound protein was detected. **(B)** GFP-G3BP1 expressed in HEK 293 cells was pulled down with GST-FLNA R21, R22, and R21-22 immobilized on glutathione beads. Bound protein was detected by western blotting against GFP.

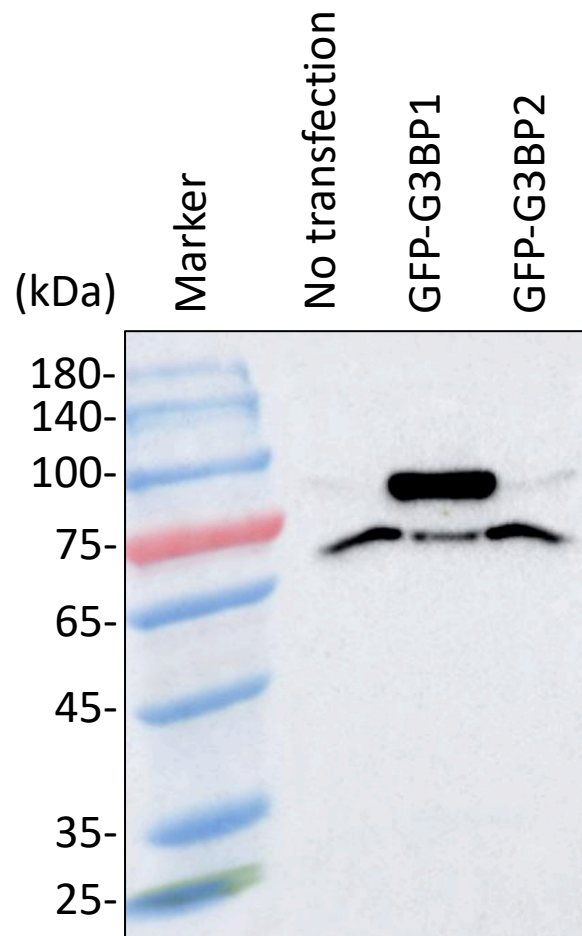

**Fig. S3. Mouse monoclonal anti-G3BP1 antibody specifically interacts with G3BP1.** GFP-G3BP1 and G3BP2 were expressed in HEK293 cells. The cell lysates were blotted using monoclonal anti-G3BP1 antibody (Proteintech, 66486-1-Ig). Note that anti-G3BP1 antibody recognizes endogenous G3BP1 and GFP-G3BP1 but not GFP-G3BP2.

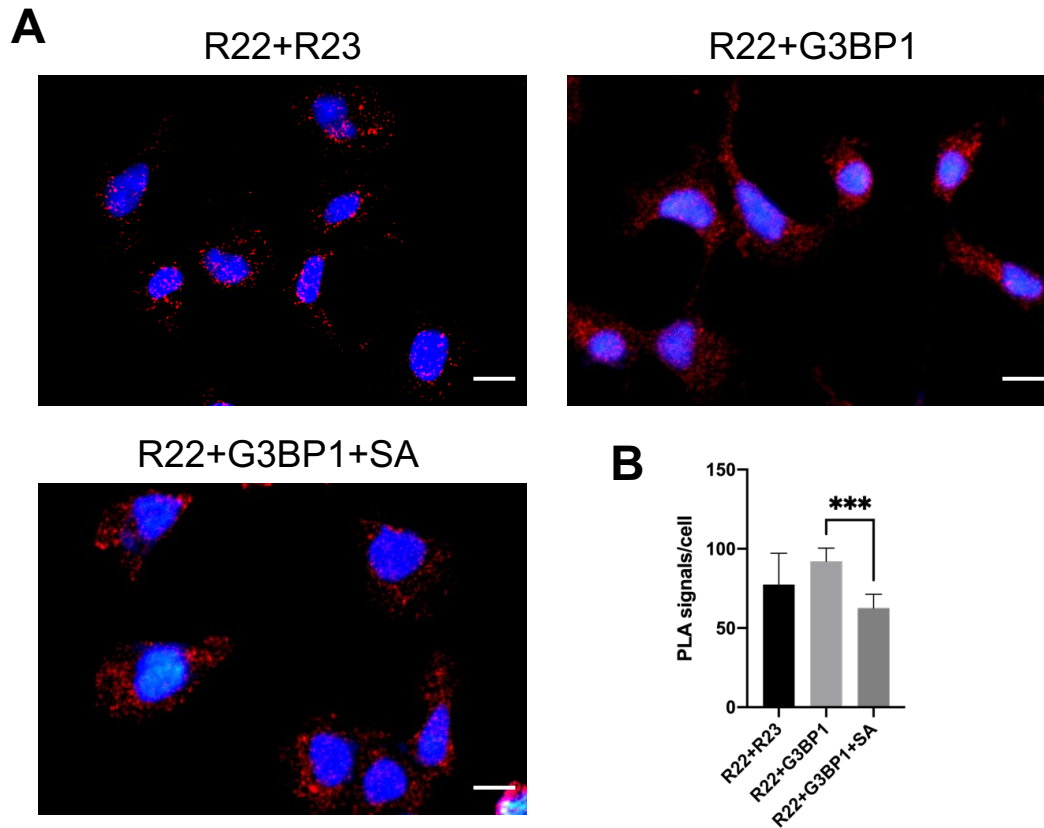

**Fig. S4. PLA signal is significantly decreased when cells are treated with sodium arsenite.** (A) Proximity ligation assay. Representative PLA images where the PLA signal (red) represents close proximity (<40nm) between two proteins. PLA signal is significantly decreased when cells are treated with 1.5 mM sodium arsenite (SA) for 1h. Scale bars: 20µm. (B) Graph shows quantification of PLA signals. (\*\*\*,  $P < 0.001$ ). Error bars represent S.D. from five independent counts.



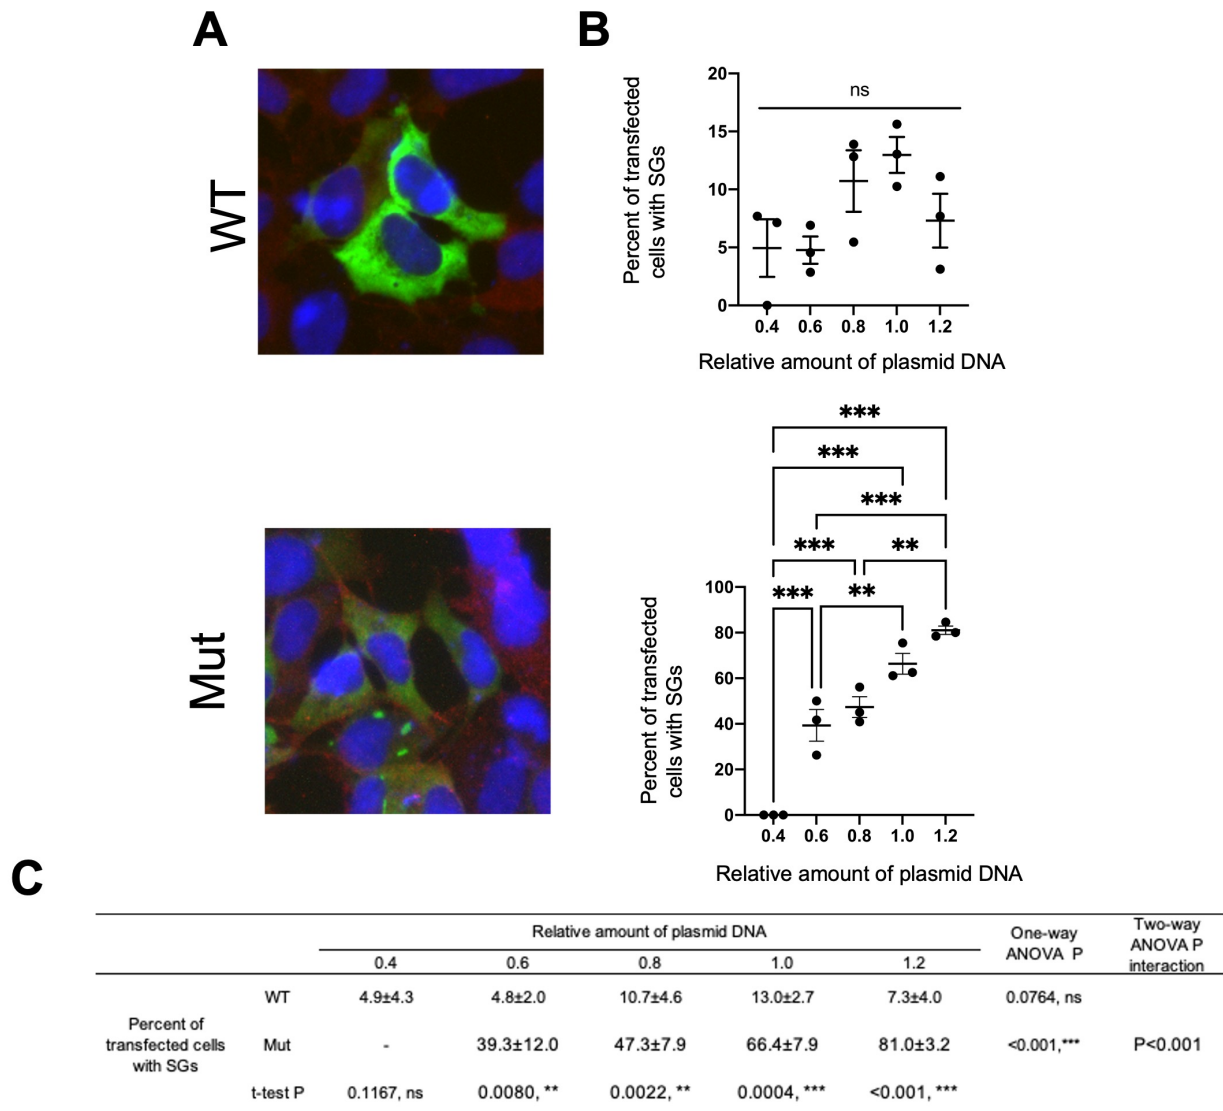

**Fig. S5. Expression of WT and F360A G3BP1 in HEK293A cells.**

(A) Merged images of HEK293A cells expressing WT or mutant G3BP1-HA. HA-tag, FLNA, and nucleus were stained in green, red, and blue, respectively. 100 × 100 μm. (B) Quantitation of cells exogenously expressing G3BP1 by transfection of different relative amount of plasmid DNA (0.4, 0.6, 0.8, 1.0, 1.2 times). P values are presented by \* (P ≤ 0.05), \*\* (P < 0.01) or \*\*\* (P ≤ 0.001) on the graph, ns (not significant). Error bars represent S.D. from three independent counts. (C) Statistical analyses. Ten cells were counted for 0.4 (relative amount of plasmid DNA) and over 50 cells were counted for 0.6~1.2 (relative amount of plasmid DNA), from three independent replicates. The results shown represent the mean (± S.D.) for three independent experiments. t-Test values are given for comparison of results in WT v.s. Mut.

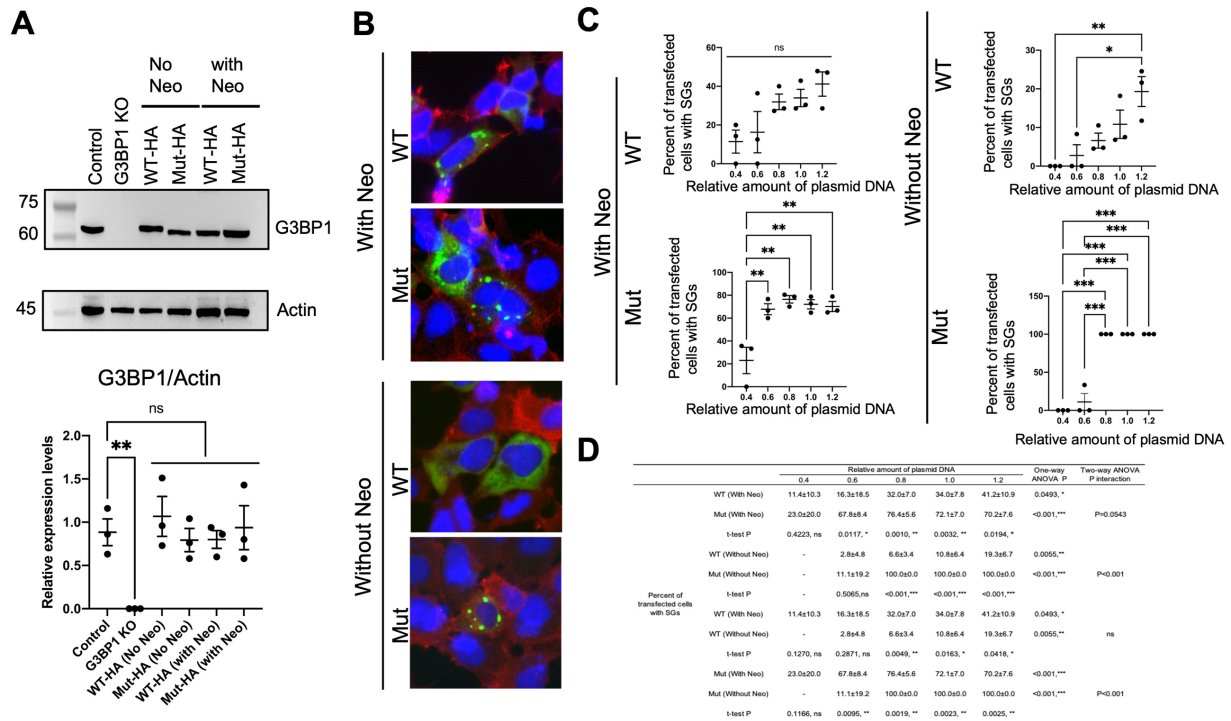

**Fig. S6. Expression of Neo<sup>R</sup> influences SG formation induced by exogenously expressed G3BP1.**

(A) Western blotting against G3BP1. G3BP1 knock-out (KO) HEK293A cells expressing HA-tagged WT and mutant G3BP1 with or without Neo<sup>R</sup>. Quantitation of relative intensity of band (bottom). Error bars represent S.D. from three independent counts. (B) Merged images of G3BP1 KO HEK293A cells expressing WT or mutant G3BP1-HA. HA-tag, FLNA, and nucleus were stained in green, red, and blue. 100 × 100 μm. (C) Quantitation of cells exogenously expressing G3BP1 by transfection of different relative amount plasmid DNA (0.4, 0.6, 0.8, 1.0, 1.2 times). P values are presented by \* (P ≤ 0.05), \*\* (P < 0.01) or \*\*\* (P ≤ 0.001) on the graph, and ns (not significant). Error bars represent S.D. from three independent counts. (D) Statistical analyses. Ten cells were counted for 0.4 (relative amount of plasmid DNA) and over 50 cells were counted for 0.6~1.2 (relative amount of plasmid DNA), from three independent replicates. The results shown represent the mean (± S.D.) for three independent experiments.

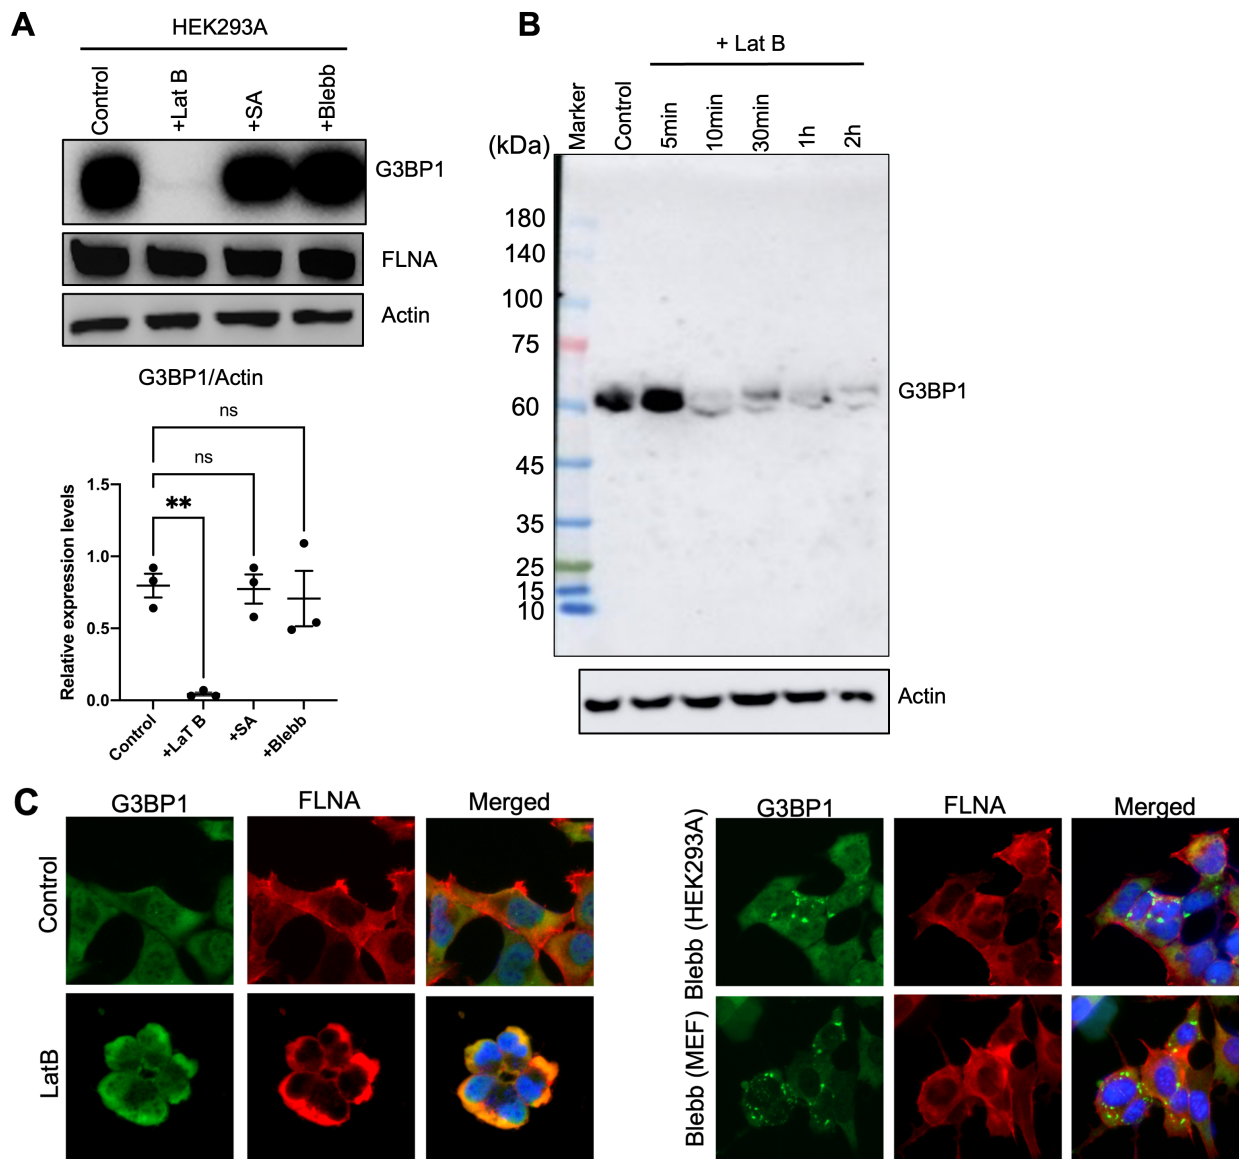

**Fig. S7. Effects of latrunculin B, sodium arsenite, and blebbistatin on expression of G3BP1 and SG formation.**

(A) Western blotting of cells treated with 5 $\mu$ M Latrunculin B (Lat B) for 2 hrs, 1.5 mM sodium arsenite (SA) for 1 hr, and 5 $\mu$ M blebbistatin (Blebb) for 2 hrs. The membrane was blotted with anti-G3BP1, anti-FLNA, and anti-actin. Relative intensities of the bands were quantitated on bottom panels. (n=3) (B) HEK293A cells were treated with 5 $\mu$ M Latrunculin B (Lat B) for various time as indicated and lysed with SDS sample buffer. Expression of G3BP1 and actin were detected by western blotting. (C) Immunofluorescent images of HEK293A cells treated with or without 5 $\mu$ M Latrunculin B (Lat B) or 5 $\mu$ M blebbistatin for 2 hrs. G3BP1, FLNA, and nucleus were stained in green, red, and blue. 100  $\times$  100  $\mu$ m.

**Table S1. Potential FLNA-binding proteins identified by SILAC-based quantitative proteomics.**

[Click here to download Table S1](#)

**Table S2. Antibodies used in this study**

| Antibodies                                             | Source                                                                                                                                                                                 | Identifier | Dilution                  |
|--------------------------------------------------------|----------------------------------------------------------------------------------------------------------------------------------------------------------------------------------------|------------|---------------------------|
| Anti-Histone H3 Monoclonal Antibody                    | Invitrogen                                                                                                                                                                             | 865R2      | 1:1000 (WB)               |
| Anti-GFP Mouse Monoclonal Antibody                     | Thermo Fisher                                                                                                                                                                          | MA5-15256  | 1:1000 (WB)               |
| Anti-6x-His Tag Mouse Monoclonal Antibody              | Thermo Fisher                                                                                                                                                                          | MA1-21315  | 1:2000 (WB)               |
| Anti-GFP Rabbit Polyclonal Antibodies                  | Abclonal (Wuhan, China)                                                                                                                                                                | AE011      | 1:2000 (WB)               |
| Anti-G3BP1 Mouse monoclonal antibody                   | Proteintech (China)                                                                                                                                                                    | 66486-1-Ig | 1:1000 (WB)<br>1:200 (IF) |
| Anti-HA Mouse monoclonal antibody                      | Proteintech (China)                                                                                                                                                                    | 66006-1-Ig | 1:2000 (WB)<br>1:500 (IF) |
| Anti-FLNA antibody                                     | anti-FLNA was outsourced (Pacific immunology, CA) using human FLNA repeat 1 and affinity purified using the antigen immobilized on NHS-Sepharose (GE Healthcare) as an affinity ligand |            | 1:400 (IF)                |
| Goat anti-mouse IgG (H+L)-horseradish peroxidase (HRP) | BioRad                                                                                                                                                                                 | 172-1011   | 1:3000 (WB)               |
| Goat anti-rabbit IgG (H+L)-HRP                         | BioRad                                                                                                                                                                                 | 172-1019   | 1:3000 (WB)               |
| Anti-Mouse IgG-Alexa Fluor Plus 488                    | invitrogen                                                                                                                                                                             | A32723     | 1:400 (IF)                |
| Anti-Mouse IgG-Alexa Fluor Plus 594                    | invitrogen                                                                                                                                                                             | A32744     | 1:400 (IF)                |
| Anti-Rabbit IgG-Alexa Fluor Plus 488                   | invitrogen                                                                                                                                                                             | A32731     | 1:400 (IF)                |
| Anti-Rabbit IgG-Alexa Fluor Plus 594                   | invitrogen                                                                                                                                                                             | A32754     | 1:400 (IF)                |

**Table S3. Oligonucleotide sequences used for PLA assay.**

| Name                              | Sequence                                                                                |
|-----------------------------------|-----------------------------------------------------------------------------------------|
| Probe-1                           | 5' azide – AAAAAAAAAAATATGACAGAACTAGACACTCTT                                            |
| Probe-2                           | 5' azide – AAAAAAAAAAGACGCTAATAGTTAAGACGCTT - 3 × 2' O-methyl RNA uracil (UUU)          |
| Circularization oligonucleotide 1 | 5' phosphate – GTTCTGTCATATTTAAGCGTCTTAA                                                |
| Circularization oligonucleotide 2 | 5' phosphate –<br>CTATTAGCGTCCAGTGAATGCGAGTCCGTCTAAGAGA<br>GTAGTACAGCAGCCGTCAAGAGTGTCTA |
| Detection oligonucleotide         | Cy3-CAGTGAATGCGAGTCCGTCT – 3 × 2' O-methyl RNA uracil (UUU)                             |
